# Supplementary material for: Patient-derived hepatitis C virus inhibits CD4+ but not CD8+ T lymphocyte proliferation in primary T cells
Source: Springer Nature journal article supplement (doi:10.1186/s12985-015-0322-4), 2015-06-17
Supplement: MOESM1 [file 9770232]

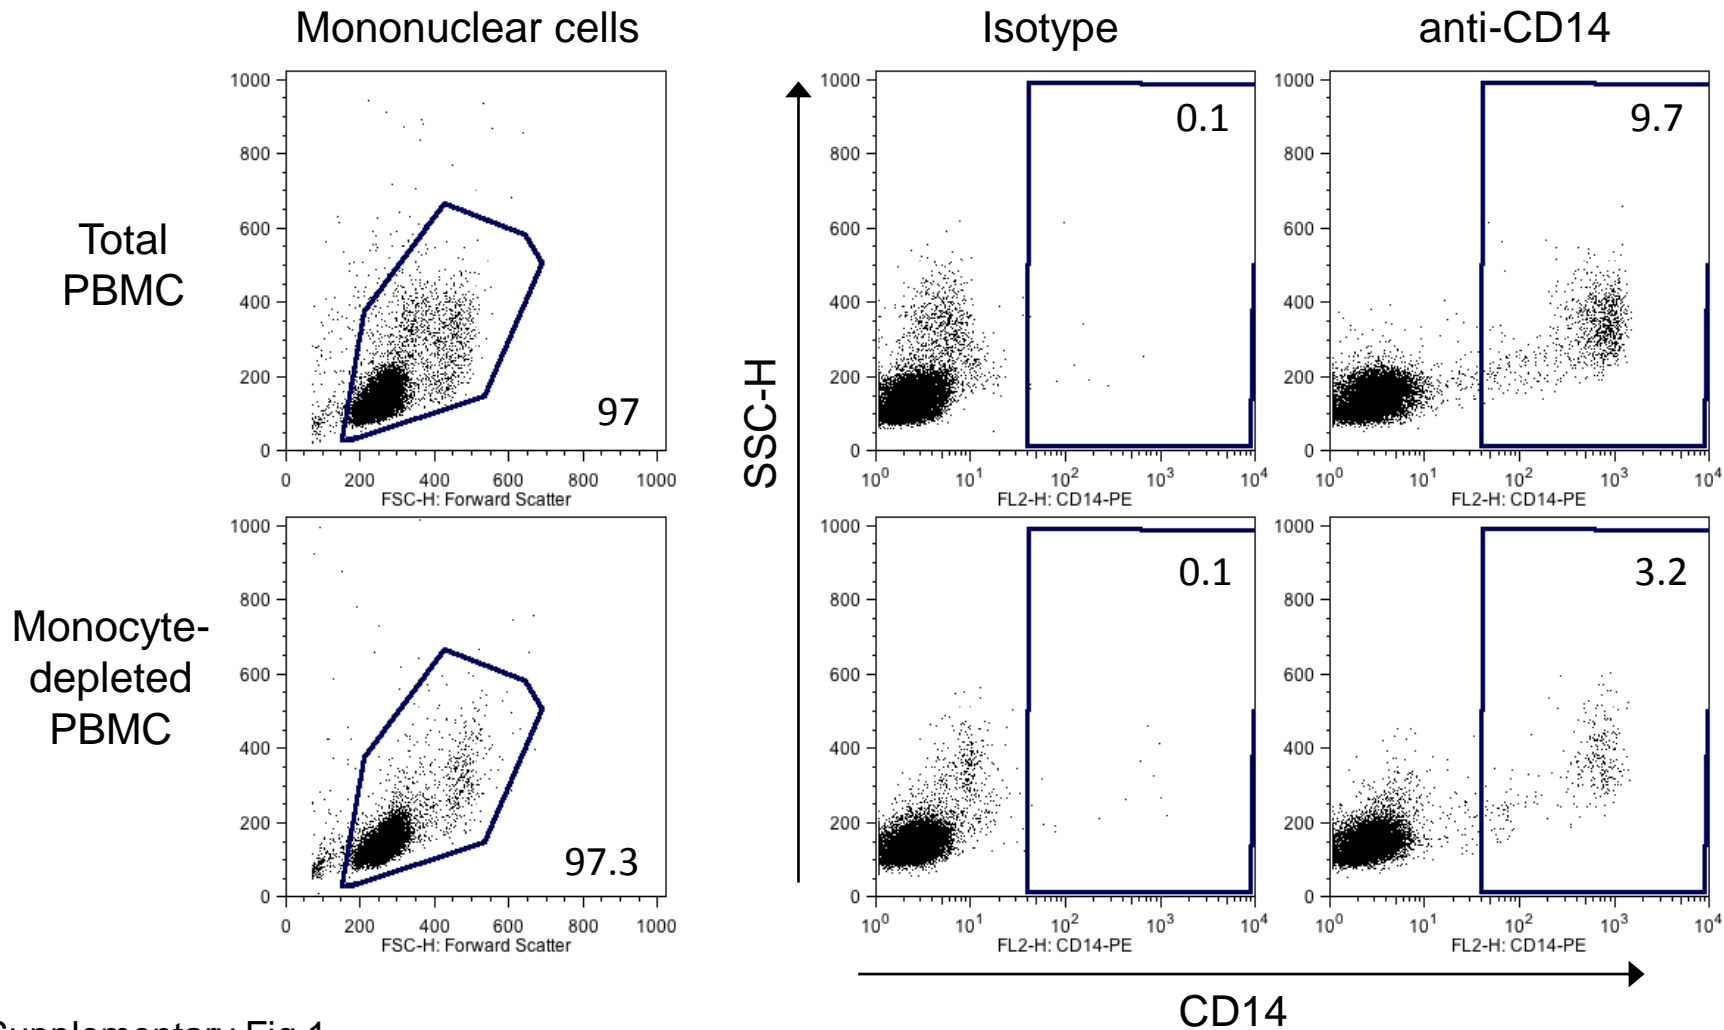

Supplementary Fig 1
